# Supplementary material
Source: HighWire-hosted journal article supplement (https://heart.bmj.com/content/103/17/1339)
Supplement: inline-supplementary-material-1 [file inline-supplementary-material-1.pdf]

## SUPPLEMENTARY DATA

**Supplementary Table 1: Baseline characteristics of patients with ACEI or ARB use at baseline.** BMI, body mass index; CABG, coronary artery bypass graft; TIA, transient ischemic attack; MI, myocardial infarction.

**Supplementary Table 2: Baseline characteristics comparison between patients included and excluded for propensity analysis.**

**Supplementary Table 3: Demographics and clinical characteristics comparison between ACEIs vs ARBs users cohorts matched on their propensity score.**

MI: myocardial infarction.

**Supplementary Figure 1: Absolute standardized differences (%) of variables between ACEIs users and ARBs users, before and after propensity score matching.**

An absolute standardized difference lower than 10% reveals well-balanced groups. MI, myocardial infarction.

**Supplementary Figure 2: Risks of outcomes in ACEI vs. ARB cohorts according to the number of cardioprotective treatments (ACEI or ARB, statins,  $\beta$ -blockers, antiplatelet agents) in propensity score-adjusted analysis.**

CV, cardiovascular; MI, myocardial infarction.

**Supplementary Figure 3: Risks of outcomes in ACEI vs. ARB cohorts according to the number of cardioprotective treatments (ACEI or ARB, statins,  $\beta$  blockers, antiplatelet agents) in propensity score-matched analysis.**

CV, cardiovascular; MI, myocardial infarction.

|                                          | All patients<br>n = 40 625 | Patients with<br>ACEI use<br>n = 27 589 | Patients with ARB<br>use<br>n = 13 036 | P value of<br>comparison |
|------------------------------------------|----------------------------|-----------------------------------------|----------------------------------------|--------------------------|
| Sex (male)                               | 25712 (63.3%)              | 18319 (66.4%)                           | 7393 (56.7%)                           | <.001                    |
| Age                                      | 68.4 (9.96)                | 67.85 (10.04)                           | 69.59 (9.68)                           | <.001                    |
| BMI (kg/m <sup>2</sup> )                 | 28.62 (5.62)               | 28.52 (5.85)                            | 28.6 (5.61)                            | .098                     |
| REACH CV risk score                      | 10.32 (3.35)               | 10.44 (3.43)                            | 10.06 (3.17)                           | <.001                    |
| GFR                                      | 83.59 (46.63)              | 84.57 (45)                              | 81.56 (49.78)                          | <.001                    |
| <b>Region</b>                            |                            |                                         |                                        |                          |
| North America                            | 16602 (40.9%)              | 11112 (40.3%)                           | 5490 (42.1%)                           | <.001                    |
| Latin America                            | 1160 (2.9%)                | 778 (2.8%)                              | 382 (2.9%)                             |                          |
| Eastern Europe                           | 4230 (10.4%)               | 4053 (14.7%)                            | 177 (1.4%)                             |                          |
| Western Europe                           | 10765 (26.5%)              | 7516 (27.2%)                            | 3249 (24.9%)                           |                          |
| Middle East                              | 578 (1.4%)                 | 436 (1.6%)                              | 142 (1.1%)                             |                          |
| Japan                                    | 2278 (5.6%)                | 786 (2.8%)                              | 1492 (11.4%)                           |                          |
| Asia                                     | 3302 (8.1%)                | 1779 (6.4%)                             | 1523 (11.7%)                           |                          |
| Australia                                | 1710 (4.2%)                | 1129 (4.1%)                             | 581 (4.5%)                             |                          |
| <b>Medical history</b>                   |                            |                                         |                                        |                          |
| Current smoker                           | 5579 (14.1%)               | 4010 (14.9%)                            | 1569 (12.4%)                           | <.001                    |
| History of hypertension                  | 37092 (91.3%)              | 24807 (89.9%)                           | 12285 (94.2%)                          | <.001                    |
| Hypercholesterolemia                     | 30426 (75%)                | 20671 (75%)                             | 9755 (74.9%)                           | .808                     |
| Obese                                    | 13227 (33%)                | 9012 (33.1%)                            | 4215 (32.8%)                           | .597                     |
| Congestive heart failure                 | 6479 (16.2%)               | 4744 (17.5%)                            | 1735 (13.6%)                           | <.001                    |
| Atrial fibrillation/flutter              | 4454 (11.2%)               | 3176 (11.7%)                            | 1278 (10%)                             | <.001                    |
| History of stable angina                 | 12251 (30.6%)              | 8820 (32.4%)                            | 3431 (26.7%)                           | <.001                    |
| History of unstable angina               | 5251 (13.1%)               | 3917 (14.4%)                            | 1334 (10.4%)                           | <.001                    |
| Coronary artery disease                  | 24537 (60.4%)              | 17615 (63.8%)                           | 6922 (53.1%)                           | <.001                    |
| Cerebrovascular disease                  | 10698 (26.3%)              | 7207 (26.1%)                            | 3491 (26.8%)                           | .160                     |
| Peripheral artery disease                | 4651 (11.4%)               | 3221 (11.7%)                            | 1430 (11%)                             | .037                     |
| History of coronary angioplasty/stenting | 10225 (25.4%)              | 7224 (26.4%)                            | 3001 (23.2%)                           | <.001                    |
| History of CABG                          | 8356 (20.7%)               | 5969 (21.7%)                            | 2387 (18.4%)                           | <.001                    |
| History of TIA                           | 4981 (12.5%)               | 3393 (12.6%)                            | 1588 (12.5%)                           | .777                     |
| History of MI                            | 13518 (33.7%)              | 10137 (37.1%)                           | 3381 (26.3%)                           | <.001                    |
| History of stroke                        | 7708 (19.2%)               | 5208 (19.1%)                            | 2500 (19.4%)                           | .428                     |
| Diabetes                                 | 19648 (48.7%)              | 12990 (47.4%)                           | 6658 (51.4%)                           | <.001                    |
| <b>Baseline medication</b>               |                            |                                         |                                        |                          |
| Acetyl salicylic acid                    | 27892 (68.7%)              | 19605 (71.1%)                           | 8287 (63.6%)                           | <.001                    |
| At least one antiplatelet                | 32231 (79.4%)              | 22276 (80.8%)                           | 9955 (76.4%)                           | <.001                    |
| Statins                                  | 29446 (72.5%)              | 20246 (73.4%)                           | 9200 (70.6%)                           | <.001                    |
| Beta blockers                            | 19925 (49.1%)              | 14389 (52.2%)                           | 5536 (42.5%)                           | <.001                    |
| Calcium channel blockers                 | 13371 (33%)                | 8437 (30.6%)                            | 4934 (37.9%)                           | <.001                    |

|                                   |              |               |              |       |
|-----------------------------------|--------------|---------------|--------------|-------|
| Nitrates/other anti-angina agents | 9963 (24.8%) | 7217 (26.5%)  | 2746 (21.3%) | <.001 |
| Diuretics                         | 19058 (47%)  | 12514 (45.4%) | 6544 (50.2%) | <.001 |
| Other anti-hypertensives          | 3544 (8.7%)  | 2287 (8.3%)   | 1257 (9.7%)  | <.001 |
| Insulin                           | 5501 (13.6%) | 3690 (13.4%)  | 1811 (13.9%) | .164  |
| Other antidiabetic agents         | 2098 (5.2%)  | 1243 (4.6%)   | 855 (6.6%)   | <.001 |
| Biguanides                        | 8609 (21.3%) | 5821 (21.2%)  | 2788 (21.5%) | .516  |
| Sulfonylureas                     | 8979 (22.2%) | 5896 (21.5%)  | 3083 (23.7%) | <.001 |
| Thiazolidinediones                | 3593 (8.9%)  | 2273 (8.3%)   | 1320 (10.2%) | <.001 |

---

**Supplementary Table 1: Baseline characteristics of patients with ACEI or ARB use at baseline**

BMI, body mass index; CABG, coronary artery bypass graft; TIA, transient ischemic attack; MI, myocardial infarction.

|                                                         | <b>Patients included in propensity analysis</b><br>n = 30,584 | <b>Patients excluded from propensity analysis</b><br>n = 10,041 |
|---------------------------------------------------------|---------------------------------------------------------------|-----------------------------------------------------------------|
| Sex (male)                                              | 19198 (62.8%)                                                 | 6514 (65%)                                                      |
| Age                                                     | 68.38 (9.99)                                                  | 68.5 (9.85)                                                     |
| GFR                                                     | 83.78 (46.5)                                                  | 81.16 (48.25)                                                   |
| <b>Region</b>                                           |                                                               |                                                                 |
| North/Latin America - Western Europe<br>Asia -Australia | 24676 (80.7%)                                                 | 8863 (88.3%)                                                    |
| Eastern Europe - Middle East - Japan                    | 5908 (19.3%)                                                  | 1178 (11.7%)                                                    |
| <b>Medical history</b>                                  |                                                               |                                                                 |
| Atrial fibrillation/flutter                             | 3443 (11.3%)                                                  | 1011 (11%)                                                      |
| Coronary artery disease                                 | 18456 (60.3%)                                                 | 6081 (60.6%)                                                    |
| Congestive heart failure                                | 5077 (16.6%)                                                  | 1402 (15%)                                                      |
| Current smoker                                          | 4339 (14.2%)                                                  | 1240 (14%)                                                      |
| Diabetes                                                | 15524 (50.8%)                                                 | 4263 (42.5%)                                                    |
| History of hypertension                                 | 27967 (91.4%)                                                 | 9125 (90.9%)                                                    |
| History of MI                                           | 10295 (33.7%)                                                 | 3223 (33.7%)                                                    |
| <b>Baseline medication</b>                              |                                                               |                                                                 |
| Acetyl salicylic acid                                   | 21271 (69.5%)                                                 | 6621 (66.2%)                                                    |
| Diuretics                                               | 14811 (48.4%)                                                 | 4247 (42.5%)                                                    |
| Nitrates/other anti-angina agents                       | 7695 (25.2%)                                                  | 2268 (23.7%)                                                    |
| Calcium channel blockers                                | 10355 (33.9%)                                                 | 3016 (30.2%)                                                    |
| Statins                                                 | 22567 (73.8%)                                                 | 6879 (68.7%)                                                    |
| Beta blockers                                           | 15273 (49.9%)                                                 | 4652 (46.5%)                                                    |

**Supplementary Table 2: Baseline characteristics comparison between patients included and excluded for propensity analysis.**

|                                                           | <b>Patients with<br/>ACEI use<br/>n = 9,902</b> | <b>Patients with ARB<br/>use<br/>n = 9,902</b> | <b>P value of<br/>comparison</b> |
|-----------------------------------------------------------|-------------------------------------------------|------------------------------------------------|----------------------------------|
| Sex (male)                                                | 5670 (57.3%)                                    | 5556 (56.1%)                                   | 0.10                             |
| Age                                                       | 69.72 (9.69)                                    | 69.63 (9.71)                                   | 0.49                             |
| GFR                                                       | 82.19 (45.16)                                   | 81.58 (49.5)                                   | 0.37                             |
| <b>Region</b>                                             |                                                 |                                                |                                  |
| North/Latin America -<br>Western Europe - Asia -Australia | 8476 (85.6%)                                    | 8397 (84.8%)                                   | 0.11                             |
| Eastern Europe - Middle East<br>- Japan                   | 1426 (14.4%)                                    | 1505 (15.2%)                                   |                                  |
| <b>Medical History</b>                                    |                                                 |                                                |                                  |
| Atrial fibrillation/flutter                               | 1023 (10.3%)                                    | 985 (9.9%)                                     | 0.37                             |
| Coronary artery disease                                   | 5227 (52.8%)                                    | 5213 (52.6%)                                   | 00.84                            |
| Congestive heart failure                                  | 1379 (13.9%)                                    | 1365 (13.8%)                                   | 0.77                             |
| Current smoker                                            | 1251 (12.6%)                                    | 1239 (12.5%)                                   | 0.79                             |
| Diabetes                                                  | 5399 (54.5%)                                    | 5309 (53.6%)                                   | 0.19                             |
| History of hypertension                                   | 9346 (94.4%)                                    | 9352 (94.4%)                                   | 0.85                             |
| History of MI                                             | 2542 (25.7%)                                    | 2593 (26.2%)                                   | 0.40                             |
| <b>Baseline Medication</b>                                |                                                 |                                                |                                  |
| Acetyl salicylic acid                                     | 6432 (65%)                                      | 6375 (64.4%)                                   | 0.39                             |
| Diuretics                                                 | 5022 (50.7%)                                    | 5102 (51.5%)                                   | 0.25                             |
| Nitrates/other anti-angina<br>agents                      | 2094 (21.1%)                                    | 2108 (21.3%)                                   | 0.80                             |
| Calcium channel blockers                                  | 3836 (38.7%)                                    | 3812 (38.5%)                                   | 0.72                             |
| Statins                                                   | 7114 (71.8%)                                    | 7125 (72%)                                     | 0.86                             |
| Beta blockers                                             | 4224 (42.7%)                                    | 4249 (42.9%)                                   | 0.71                             |

**Supplementary Table 3: Demographics and clinical characteristics comparison between ARB vs. ACEI users cohorts matched on their propensity score.**  
MI: myocardial infarction.

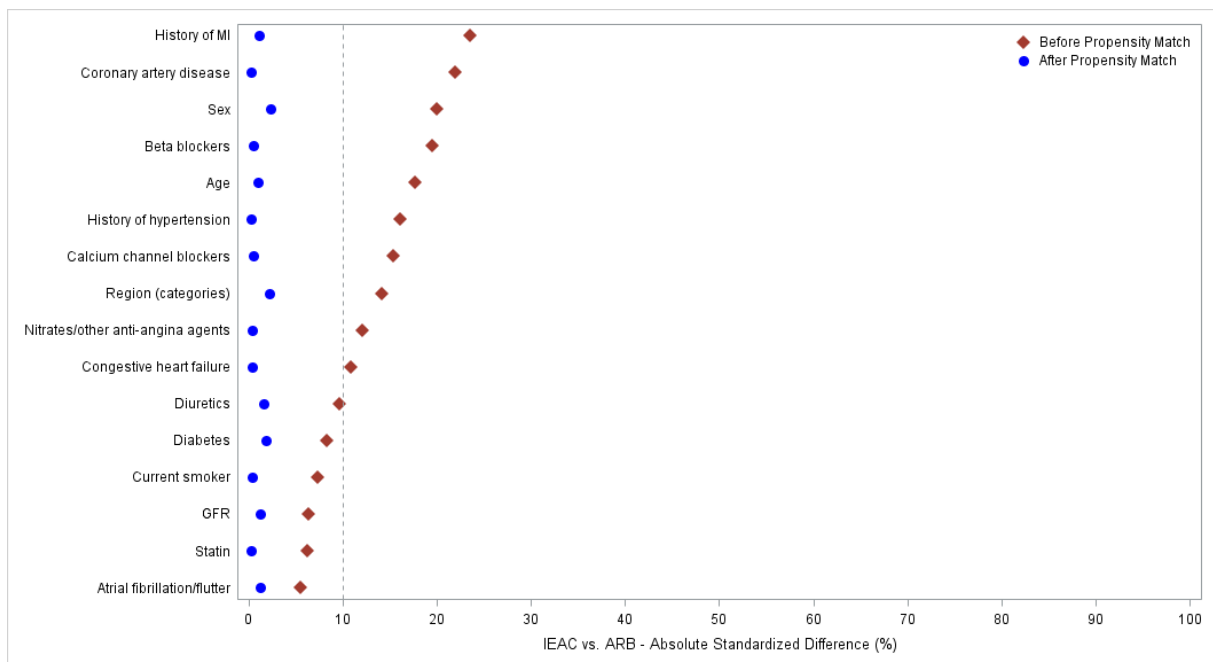

**Supplementary Figure 1: Absolute standardized differences (%) of variables between ACEIs users and ARBs users, before and after propensity score matching.**

An absolute standardized difference lower than 10% reveals well-balanced groups. MI, myocardial infarction.

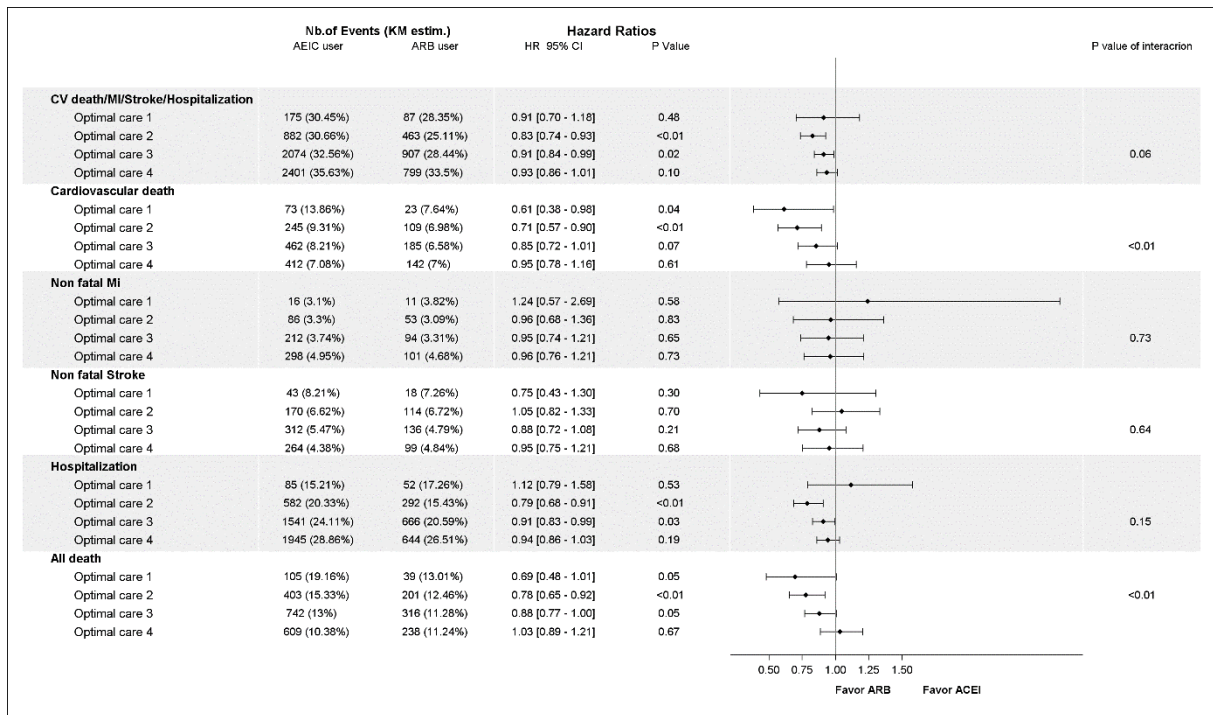

**Supplementary Figure 2: Risks of outcomes in ACEI vs. ARB cohorts according to the number of cardioprotective treatments (ACEI or ARB, statins,  $\beta$ -blockers, antiplatelet agents) in propensity score-adjusted analysis.**  
 CV, cardiovascular; MI, myocardial infarction.

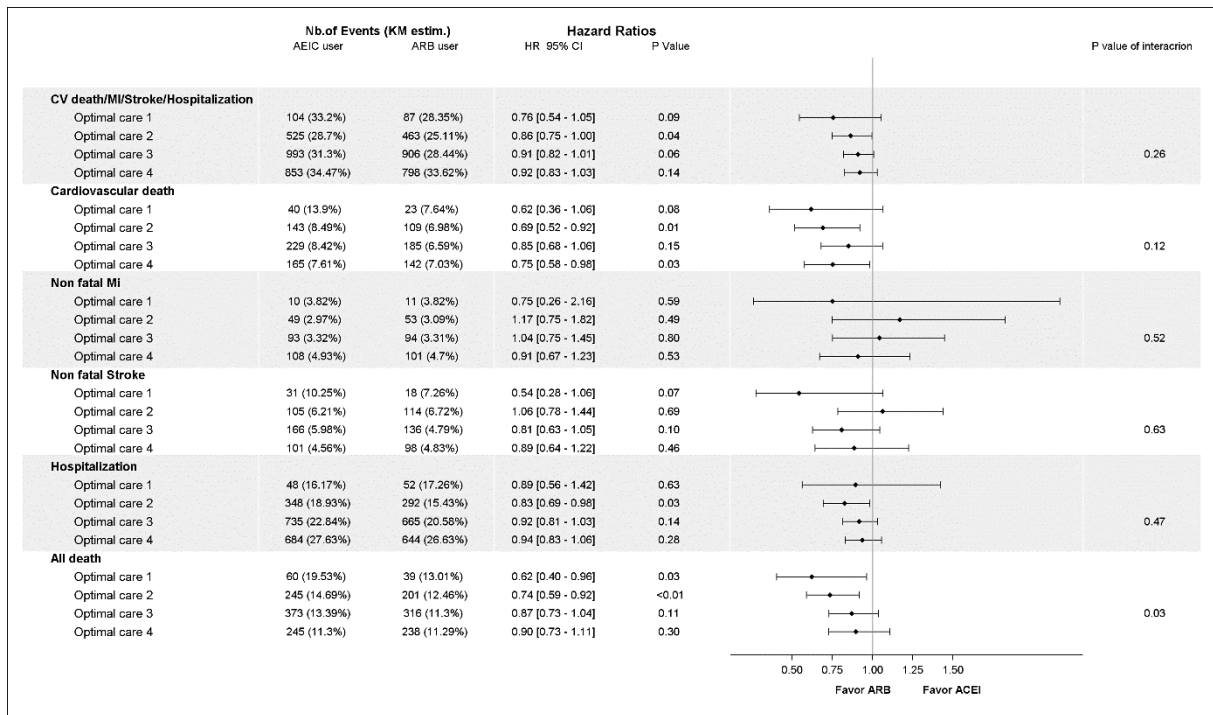

**Supplementary Figure 3: Risks of outcomes in ACEI vs. ARB cohorts according to the number of cardioprotective treatments (ACEI or ARB, statins,  $\beta$  blockers, antiplatelet agents) in propensity score-matched analysis.**  
 CV, cardiovascular; MI, myocardial infarction.
